# Supplementary material for: Severe hypoxia induces complete antifolate resistance in carcinoma cells due to cell cycle arrest
Source: PubMed Central journal article supplement — Cell Death Dis. 2014 Feb 20;5(2):e1067–. doi: 10.1038/cddis.2014.39 (PMC3944254; doi:10.1038/cddis.2014.39), 2014-02-20
Supplement: cddis201439x4.pdf [file cddis201439x4.pdf]

Figure S4

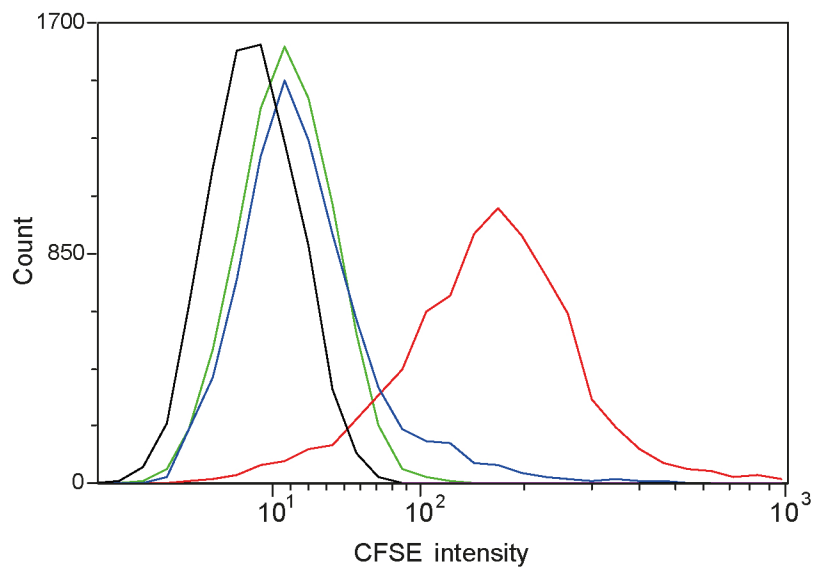

| Histogram | Growth conditions | Median |
|-----------|-------------------|--------|
| Green     | Normoxia          | 18     |
| Red       | DMOG              | 163    |
| Blue      | Recovery          | 22     |
| Black     | Unstained         | -0.1   |
