# Supplementary material for: Severe hypoxia induces complete antifolate resistance in carcinoma cells due to cell cycle arrest
Source: PubMed Central journal article supplement — Cell Death Dis. 2014 Feb 20;5(2):e1067–. doi: 10.1038/cddis.2014.39 (PMC3944254; doi:10.1038/cddis.2014.39), 2014-02-20
Supplement: cddis201439x7.pdf [file cddis201439x7.pdf]

**Table S1.** Primers used for real-time PCR.

| <b>Gene</b>   | <b>Forward (5'-3')</b>    | <b>Reverse (5'-3')</b>  | <b>Ref.</b> |
|---------------|---------------------------|-------------------------|-------------|
| <b>PCFT</b>   | CACTCTACCCAGCCACTCTGAAC   | GATCAGCCTTTTCCAGCATCC   | 1           |
| <b>RFC</b>    | ACCATCATCACTTTCATTGTCTC   | ATGGACAGGATCAGGAAGTACA  | 1           |
| <b>FPGS</b>   | CCGAGCATGGAGTACCAGGA      | GCGCTTACCTGCTCCAG       | 1           |
| <b>DHFR</b>   | ATGCCTAAAACCTACTGAACAACCA | TGGGTGATTCATGGCTTCT     | 1           |
| <b>TS</b>     | TCCCGAGACTTTTTGGACAGC     | TGATGGTGTCAATCACTCTTTGC | 1           |
| <b>GARTF</b>  | GTGGAGGAAGGGAACATACGC     | TCTCTTGCAGAATTGAGCAAGG  | 1           |
| <b>BCRP</b>   | GGATGAGCCTACAACCTGGCTT    | CTTCCTGAGGCCAATAAGGTG   | 2           |
| <b>MRP-1</b>  | GTGTTTCTGGTCAGCCCAACT     | TTGGATCTCAGGATGGCTAGG   | 2           |
| <b>CAD</b>    | GGTCTCTGCAAGTGGTTTGAA     | CCTGTTCCCGCAACTTCTT     | Current     |
| <b>ENT1</b>   | GGGCAGCCTGTTTGGTCT        | CCACTGGCAATAGCGCAG      | Current     |
| <b>ENT2</b>   | CTCCTGTCCATGGCCAGTG       | GGGCCTGGGATGATTTATTG    | Current     |
| <b>ENT3</b>   | TCAGCGGTGCCTCCACTGT       | GCAGCCAAGTCCACCAATGA    | Current     |
| <b>CNT3</b>   | ACATTTCTTTTGGGGTTCCAT     | GCAATCAGATTCACAGCGATG   | Current     |
| <b>Glut-1</b> | GAAGGTGATCGAGGAGTTCTACA   | CATAGCGGTGGACCCATGTC    | Current     |
| <b>VEGF</b>   | TGCCAAGTGGTCCCAG          | GTGAGGTTTGATCCGC        | 3           |
| <b>Gus-B</b>  | CCATTCCTATGCCATCGTG       | ATGTCGGCCTCGAAGGG       | Current     |

1. Gonen, N and Assaraf, YG, (2010) The obligatory intestinal folate transporter PCFT (SLC46A1) is regulated by nuclear respiratory factor 1. *J Biol Chem* 285: 33602-13.
2. Evseenko, DA, Murthi, P, Paxton, JW, Reid, G, Emerald, BS, Mohankumar, KM et al., (2007) The ABC transporter BCRP/ABCG2 is a placental survival factor, and its expression is reduced in idiopathic human fetal growth restriction. *Faseb J* 21: 3592-605.
3. Xu, J, Wang, B, Xu, Y, Sun, L, Tian, W, Shukla, D et al., (2012) Epigenetic regulation of HIF-1alpha in renal cancer cells involves HIF-1alpha/2alpha binding to a reverse hypoxia-response element. *Oncogene* 31: 1065-72.
