# Supplementary figures and images for: Severe hypoxia induces complete antifolate resistance in carcinoma cells due to cell cycle arrest
Source: PubMed Central journal article supplement — Cell Death Dis. 2014 Feb 20;5(2):e1067–. doi: 10.1038/cddis.2014.39 (PMC3944254; doi:10.1038/cddis.2014.39), 2014-02-20

Fig.S1

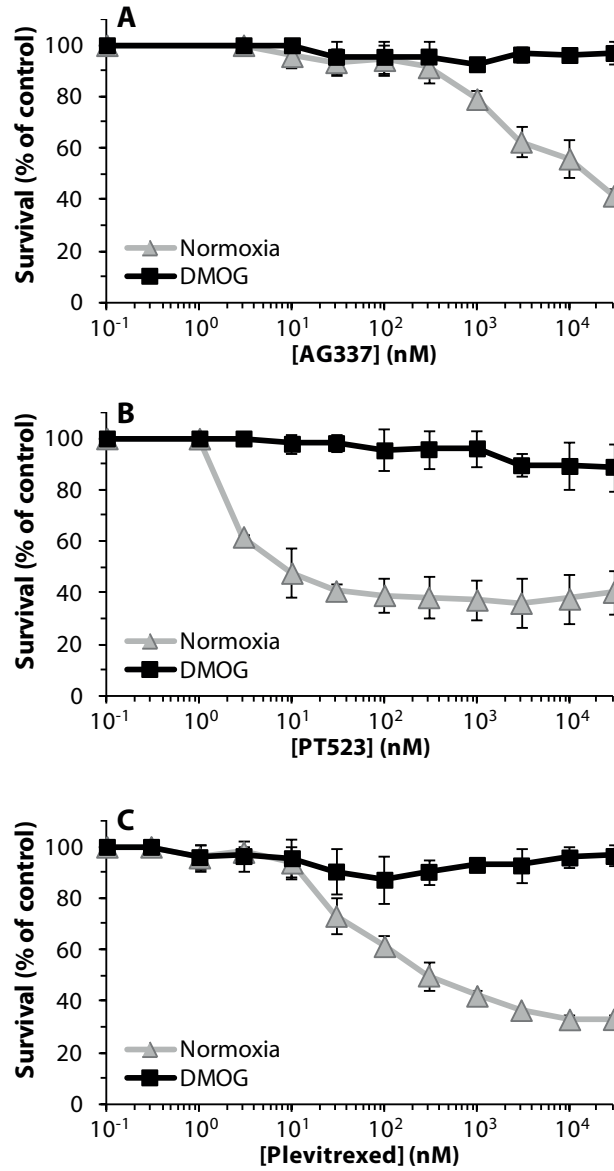

Supplement: cddis201439x1.pdf [file cddis201439x1.pdf]

Figure S2

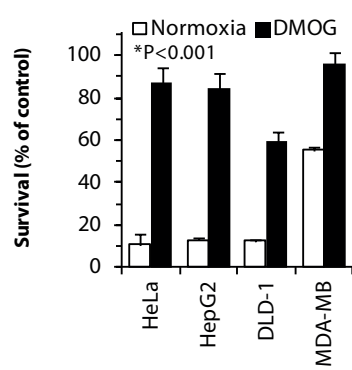

Supplement: cddis201439x2.pdf [file cddis201439x2.pdf]
